# Supplementary material for: A paper microfluidic device based colorimetric sensor for the detection and discrimination of elapid versus viper envenomation
Source: Royal Society of Chemistry journal article supplement (doi:10.1039/d1an01698a), 2021-12-20
Supplement: d1an01698a2.pdf [file d1an01698a2.pdf]

**Paper microfluidics device based colorimetric sensor for the detection and discrimination of elapid versus viper envenomation**

Lakshmi Narashimhan Ramana <sup>1\*</sup>, Santosh S Mathapati <sup>2</sup>, Nitin Salvi<sup>3</sup>, M.V. Khadilkar<sup>3</sup>, Anita Malhotra <sup>4</sup>, Vishal Santra<sup>5,6</sup> and Tarun Kumar Sharma <sup>1\*</sup>

<sup>1</sup>Aptamer Technology and Diagnostics Laboratory, Multidisciplinary Clinical and Translational Research Group, Translational Health Science and Technology Institute (THSTI), Faridabad, Haryana 121001, India

<sup>2</sup>Multidisciplinary Clinical and Translational Research Group, , Translational Health Science and Technology Institute (THSTI), Faridabad, Haryana 121001, India

<sup>3</sup>Premium Serums and Vaccines Pvt. Ltd, Maharashtra, 410504, India.

<sup>4</sup>School of Natural sciences, College of Environment sciences and Engineering, Bangor University, Bangor LL57 2UW, UK

<sup>5</sup>Society for Nature Conservation, Research and Community Engagement (CONCERN), Nalikul, Hooghly, 712407, West Bengal, India

<sup>6</sup>Captive and Field Herpetology, 13 Hirfron, Anglesey, LL65 1YU, Wales, UK.

\*Corresponding authors: Lakshmi Narashimhan Ramana and Tarun Kumar Sharma

Email: lnramana@thsti.res.in, [tarun@thsti.res.in](mailto:tarun@thsti.res.in)

## Supplementary information

**Table ST1**

| <b>S. No.</b> | <b>Methodology of detection</b>                                                  | <b>Viper species</b>                | <b>Range of detection</b>                   | <b>Detection time (in min)</b> | <b>References</b> |
|---------------|----------------------------------------------------------------------------------|-------------------------------------|---------------------------------------------|--------------------------------|-------------------|
| <b>1</b>      | Enzyme-linked Immunosorbent assay (ELISA)                                        | Saw-scaled viper                    | 5 ng ml <sup>-1</sup>                       | 240                            | <sup>1</sup>      |
| <b>2</b>      | Enzyme-linked Immunosorbent assay (Fluorescence-based)                           | Russell's viper                     | 0.1 pg ml <sup>-1</sup>                     | 240                            | <sup>2</sup>      |
| <b>3</b>      | Enzyme-linked Immunosorbent assay                                                | Russell's viper                     | 2.4 ng ml <sup>-1</sup>                     | 300                            | <sup>3</sup>      |
| <b>4</b>      | Enzyme-linked Immunosorbent assay (ELISA)                                        | Russell's viper<br>Saw-scaled viper | 0.1 ng ml <sup>-1</sup>                     | 25                             | <sup>4</sup>      |
| <b>5</b>      | Radioimmunoassay (RIA)                                                           | Russell's viper                     | 0.1 ng ml <sup>-1</sup>                     | 1440                           | <sup>5</sup>      |
| <b>6</b>      | Radioimmunoassay (RIA)                                                           | Russell's viper                     | 4 ng ml <sup>-1</sup>                       | 60                             | <sup>6</sup>      |
| <b>7</b>      | Antibody based LFA (Later flow assay)                                            | Russell's viper                     | 5 ng ml <sup>-1</sup>                       | 10                             | <sup>7</sup>      |
| <b>8</b>      | Immunochromatographic strip<br>Gold nanoparticles – Antibody<br>Later flow assay | Russell's viper                     | 10 ng ml <sup>-1</sup>                      | 25                             | <sup>8</sup>      |
| <b>9</b>      | <b>Paper microfluidics immobilised with gelatin nanoparticles</b>                | <b>All viper species</b>            | <b>3.125 ng for RVV<br/>6.25 ng for SSV</b> | <b>25</b>                      | <b>This work</b>  |

**Table ST1:** Detection of viper's venom using various technique (in the presence of buffer and spiked sera

### LOD and LOQ calculation

**LOD** is the point at which the corresponding lower concentration absorbance is more than can be reliably detected

**For Buffer**      Mean of control + 3 X S.D. of control

Mean of control: 0.045

S.D of control: 0.001

LOD:  $0.045 + 3 \times 0.001$

**LOD: 0.0480**

**For Serum**      Mean of control + 3 X S.D. of control

Mean of control: 0.057

S.D of control: 0.00529

LOD:  $0.057 + 3 \times 0.00529$

**LOD: 0.0728**

Hence, the lowest amount of venom, whose absorbance is more than 0.0728 can be considered as LOD

**LOQ** is point of concentration that can be measured with a defined precision and accuracy

**For Buffer**      Mean of control + 10 X S.D. of control

Mean of control: 0.045

S.D of control: 0.001

LOD:  $0.045 + 10 \times 0.001$

**LOD: 0.055**

**For Serum**      Mean of control + 10 X S.D. of control

Mean of control: 0.057

S.D of control: 0.00529

LOD:  $0.057 + 10 \times 0.00529$

**LOD: 0.1099**

Hence, the lowest amount of venom, whose absorbance is more than 0.1099 can be considered as LOQ

**Table ST2**

**Table ST2.** Spiked recovery test for detection of protease activity of viper venom in human serum (1 to 6 for Russell's viper and 7 to 13 for Saw-scaled viper)

| Si.no            | Amount of venom<br>(ng) | Recovery<br>(%) | Average<br>Recovery (%) |
|------------------|-------------------------|-----------------|-------------------------|
| Russell's viper  |                         |                 | 89.4                    |
| 1                | 200                     | 86              |                         |
| 2                | 100                     | 87              |                         |
| 3                | 50                      | 80              |                         |
| 4                | 25                      | 76              |                         |
| 5                | 12.5                    | 83              |                         |
| 6                | 6.25                    | 122             |                         |
| Saw-scaled viper |                         |                 | 89.5                    |
| 7                | 200                     | 92              |                         |
| 8                | 100                     | 81              |                         |
| 9                | 50                      | 90              |                         |
| 10               | 25                      | 89              |                         |
| 11               | 12.5                    | 103             |                         |
| 12               | 6.25                    | 76              |                         |
| 13               | 3.125                   | 91              |                         |

**Figure S1**

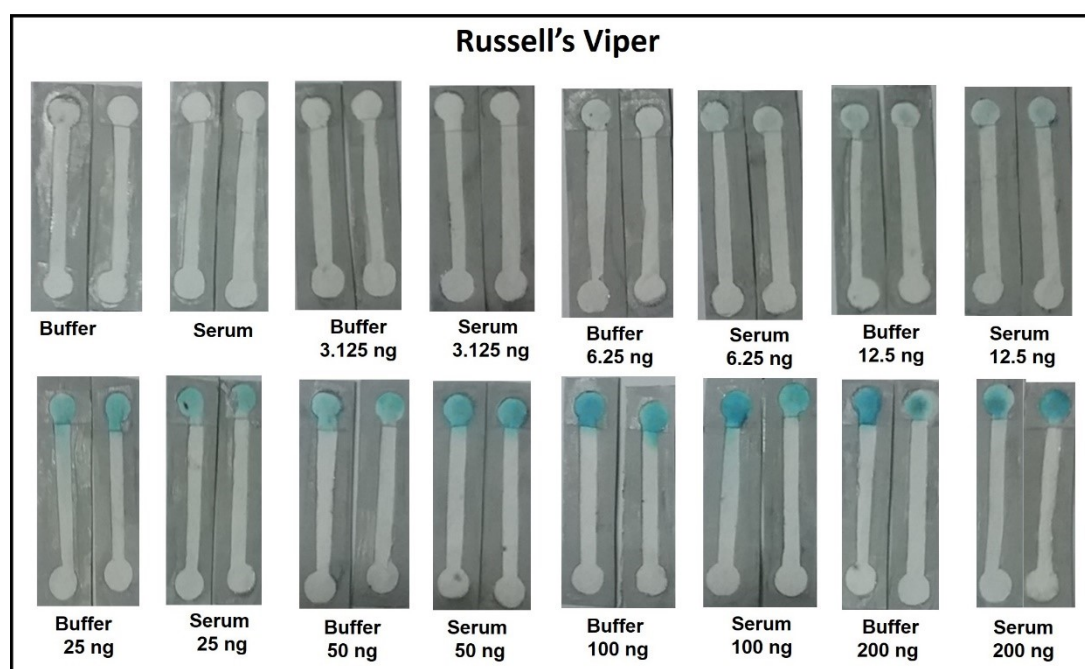

**Figure S1:** Detection of Russell's viper venom using paper microfluidics incubated with various amount of venom (3.125, 6.25, 12.5, 25, 50, 100, 200 ng) in the presence of buffer and spiked sera

Note: First two images labelled Buffer and Serum refers to control buffer and unspiked serum respectively.

**Figure S2**

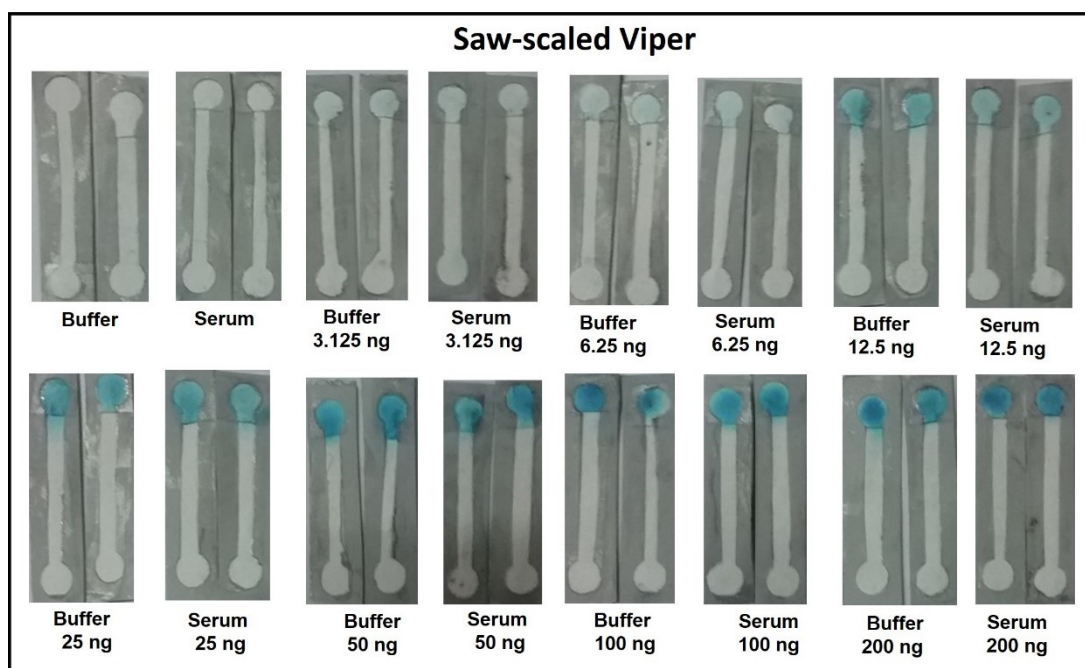

**Figure S2:** Detection of Saw-scaled viper venom using paper microfluidics incubated with various amount of venom (3.125, 6.25, 12.5, 25, 50, 100, 200 ng) in the presence of buffer and spiked sera

Note: First two images labelled Buffer and Serum refers to control buffer and unspiked serum respectively.

**Figure S3**

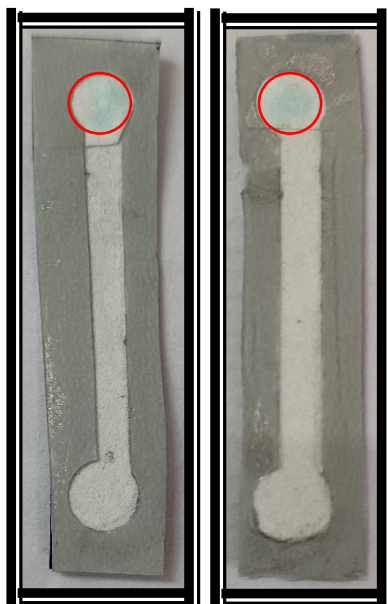

**Figure S3:** Low-end detection limit of gelatinase activity determined using paper microfluidics (red circles illustrate colour change (blue) at detection zone). First panel represent sensor response in buffer and second one in venom spiked human serum.

**Figure S4**

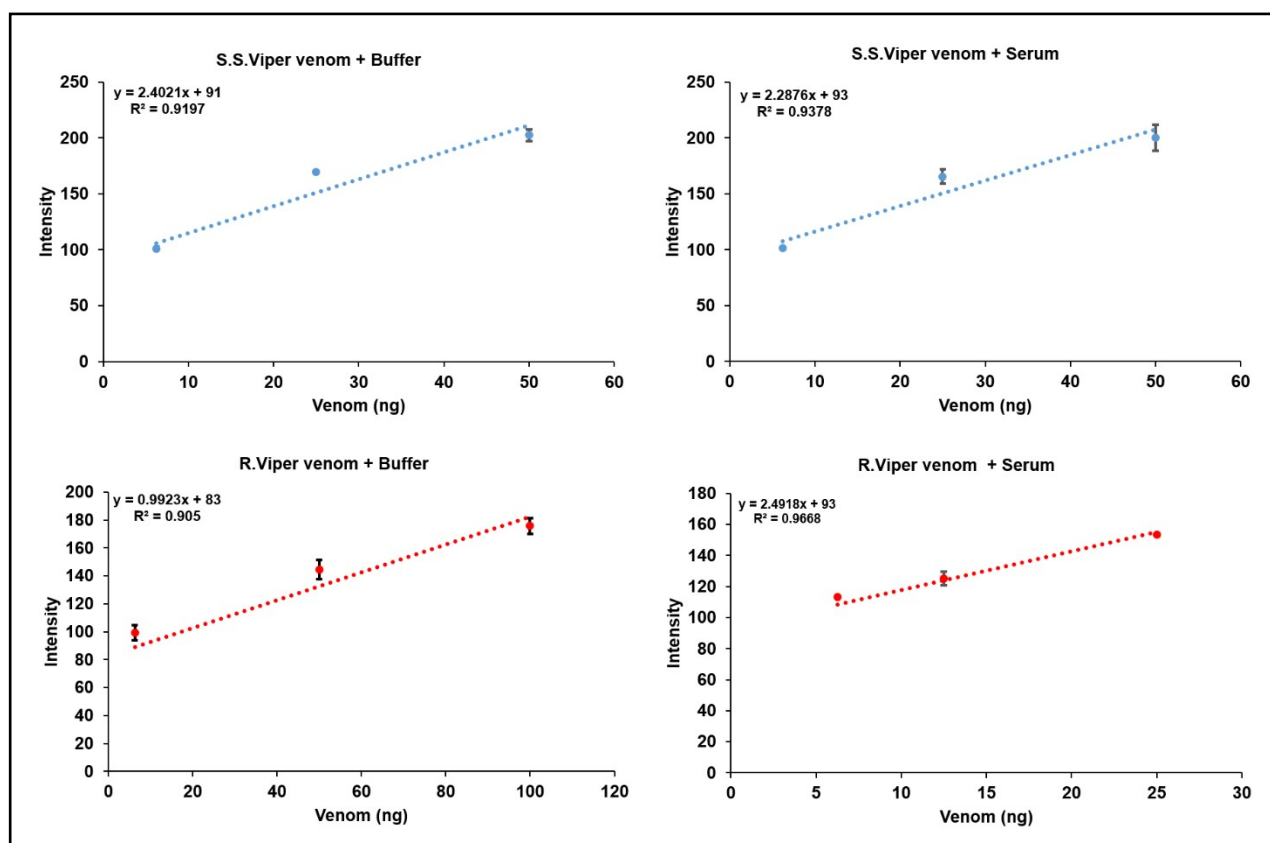

**Figure S5:** Linear range plot of colour intensity in paper microfluidics measured using ImageJ program with different amount of viper venom (Russell's viper, Saw-scaled viper) in buffer and spiked serum



**Figure S5**

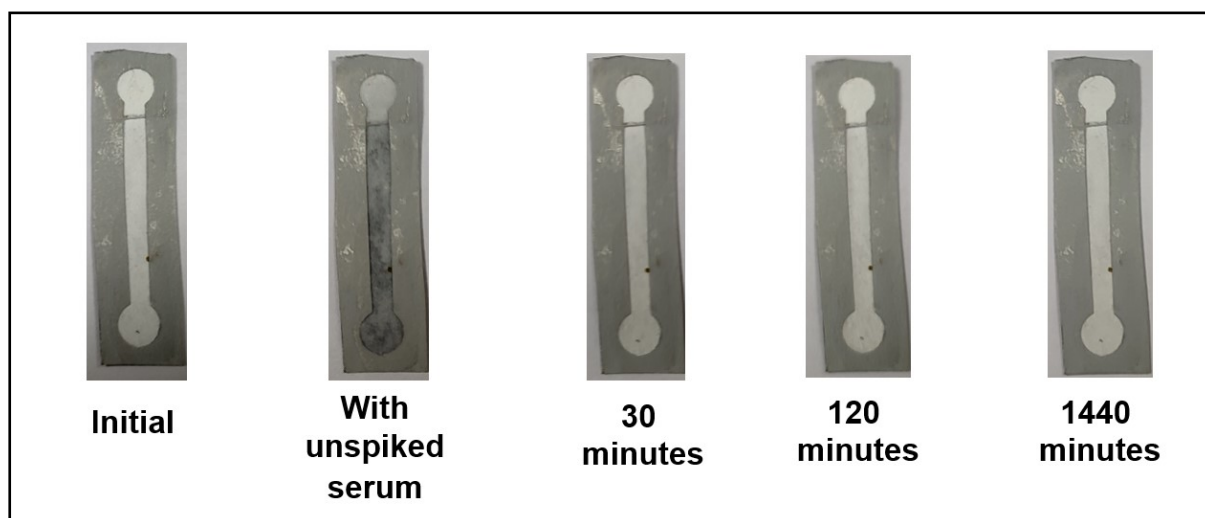

**Figure S4:** Stability of paper microfluidics incubated with the presence of unspiked serum (no venom added) at various time points

Figure S6

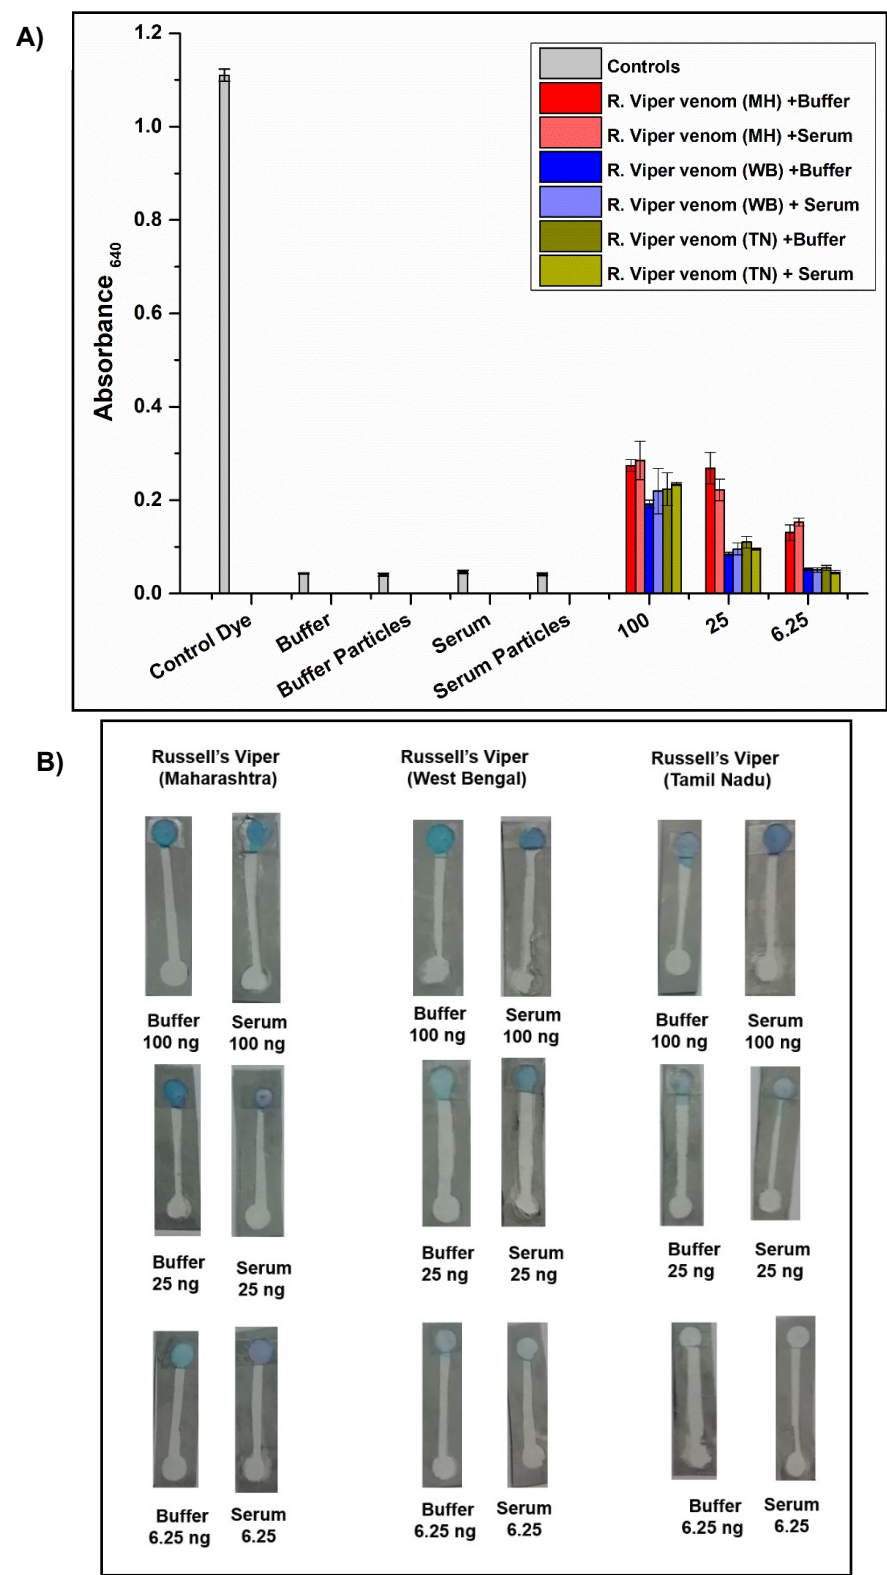

**Figure S6:** Detection of different Russell's viper venom from geographically distinct regions, based on dye release from GMG nanoparticles due to gelatinase activity of proteases **A)** ELISA **B)** paper microfluidics

Figure S7

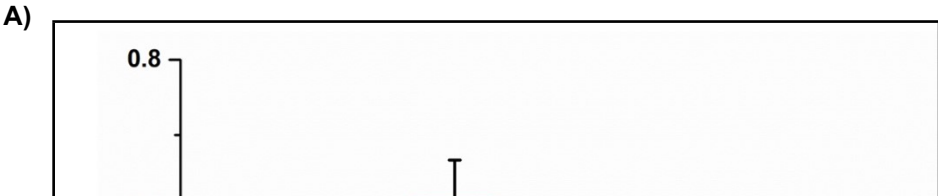

**Figure S7:** Detection of stability of GMG nanoparticles in presence of enzymes and amino acids mainly urease, human phospholipase A2, malate synthase and casaminoacids both quantitatively ((A) ELISA) and qualitatively ((B) paper microfluidics)

#### **References:**

1. Theakston, R. D. G.; Jane Lloyd-Jones, M.; Reid, H. A., MICRO-ELISA FOR Detecting and assaying snake venom and venom-antibody. *The Lancet* **1977**, *310* (8039), 639-641.
2. Bhatti, A. R.; Wong, J. P.; Siddiqui, Y. M.; Siddiqui, S., A sensitive fluorogenic enzyme linked immunosorbent assay for the detection of *Vipera russelli* venom. *Natural Toxins* **1993**, *1* (5), 277-282.
3. Tan, C. H.; Tan, N. H.; Sim, S. M.; Fung, S. Y.; Gnanathanan, C. A., Immunological properties of *Hypnale hypnale* (hump-nosed pit viper) venom: Antibody production with diagnostic and therapeutic potentials. *Acta Tropica* **2012**, *122* (3), 267-275.
4. Gao, J.-F.; Wang, J.; Qu, Y.-F.; Ma, X.-M.; Ji, X., Immunoreactivity between venoms and commercial antisera in four Chinese snakes and venom identification by species-specific antibody. *Journal of Immunological Methods* **2013**, *387* (1), 211-218.
5. Coulter, A. R.; Fox, J. C.; Sutherland, S. K.; Waddell, C. J., A new solid-phase sandwich radioimmunoassay and its application to the detection of snake venom. *Journal of Immunological Methods* **1978**, *23* (3), 241-252.
6. Pukrittayakamee, S.; Ratcliffe, P. J.; McMichael, A. J.; Warrell, D. A.; Bunnag, D., A competitive radioimmunoassay using a monoclonal antibody to detect the factor X activator of Russell's viper venom. *Toxicon* **1987**, *25* (7), 721-729.
7. Pawade, B. S.; Salvi, N. C.; Shaikh, I. K.; Waghmare, A. B.; Jadhav, N. D.; Wagh, V. B.; Pawade, A. S.; Waykar, I. G.; Potnis-Lele, M., Rapid and selective detection of experimental snake envenomation – Use of gold nanoparticle based lateral flow assay. *Toxicon* **2016**, *119*, 299-306.
8. Lin, J.-H.; Lo, C.-M.; Chuang, S.-H.; Chiang, C.-H.; Wang, S.-D.; Lin, T.-Y.; Liao, J.-W.; Hung, D.-Z., Collocation of avian and mammal antibodies to develop a rapid and sensitive

diagnostic tool for Russell's Vipers Snakebite. *PLOS Neglected Tropical Diseases* **2020**, *14* (9), e0008701.
